# Supplementary material
Source: PubMed Central journal article supplement (PMC3278337)
Supplement: NIHMS323857-supplement-Supplement.pdf [file NIHMS323857-supplement-Supplement.pdf]

DOI: 10.1038/ncb2163

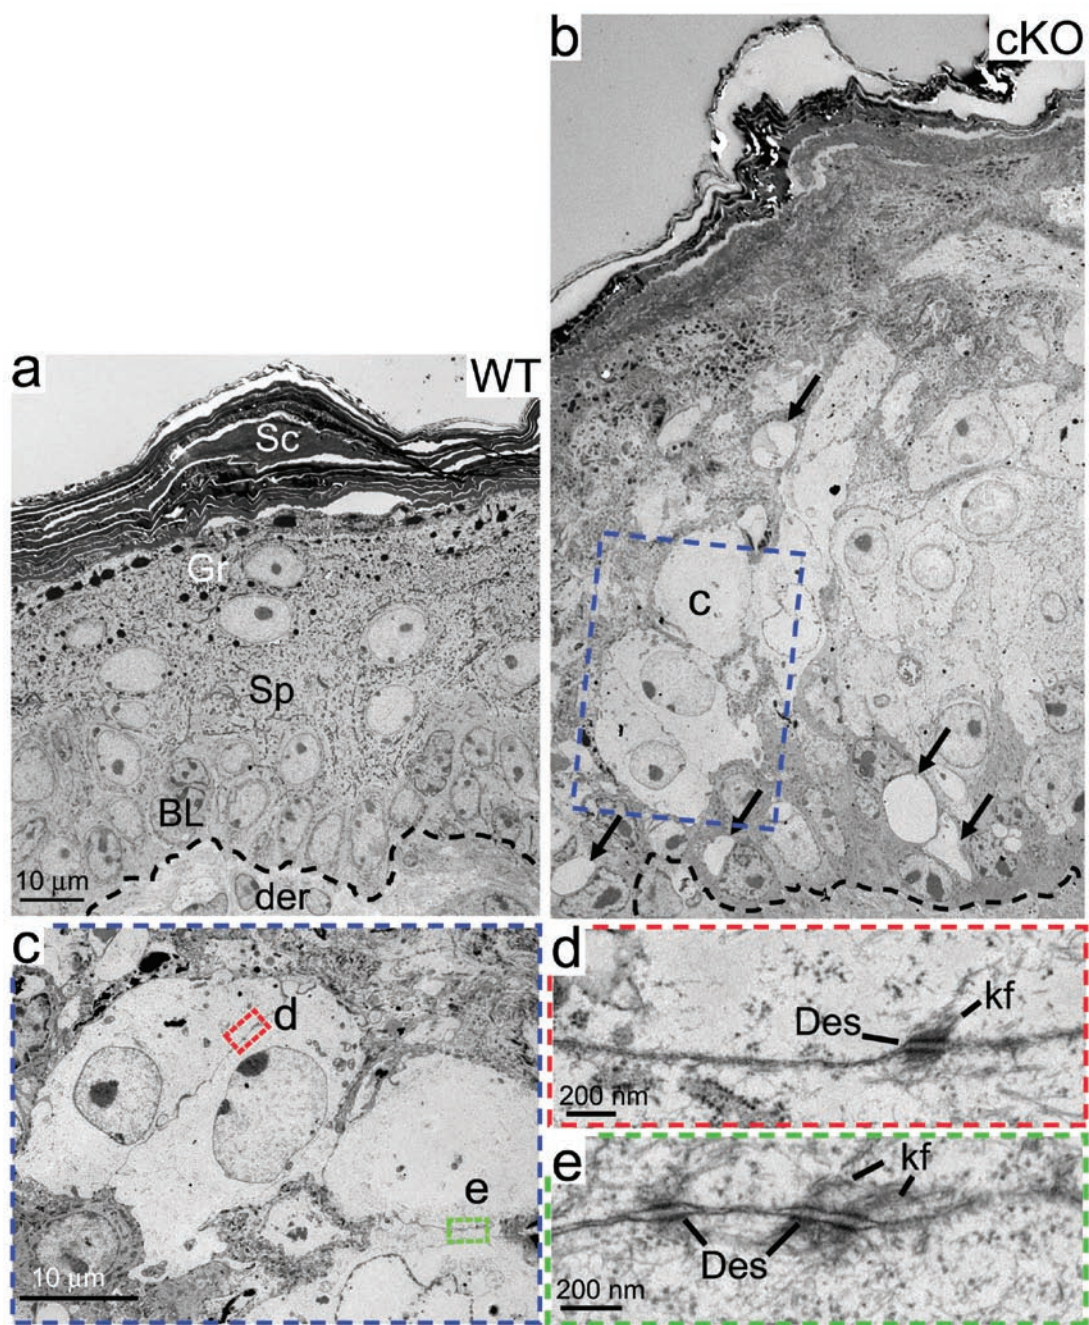

**Figure S1** Srf-deficient newborn epidermis is grossly defective and yet cells within the tissue still display typical signs of adhesion. Ultrastructural analysis of WT (a) and Srf-cKO (b) epidermis. Arrows indicate vacuoles, prevalent by newborn, which could be mistaken for adhesive gaps at the light microscopic

level. Morphology shows grossly disorganized epidermis. (c) Boxed area in (b) is shown at higher magnification. (d-e) Boxed areas in (c) are shown at higher magnification. Kf, keratin filaments; Des, desmosome; Der, dermis; BL, basal layer; SP, spinous layer; Gr, granular layer; Sc, stratum corneum. Bars=10 $\mu$ m

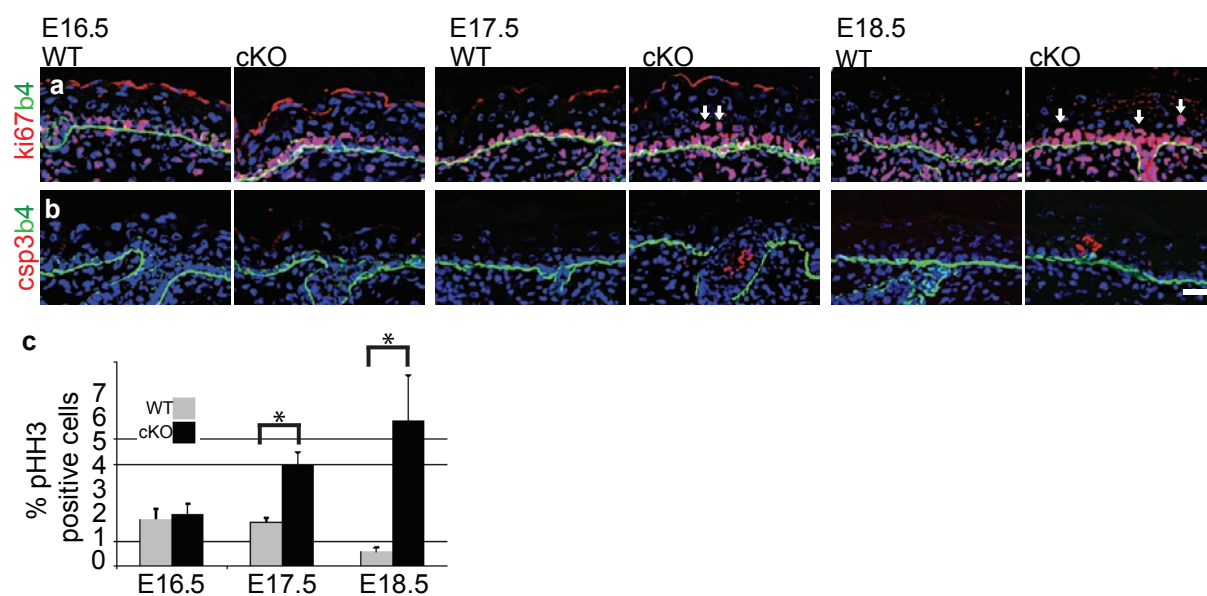

**Figure S2** Elevated proliferation and apoptosis in *Srf*-cKO epidermis is evident beginning at E17.5. (a-f) Immunofluorescence of frozen backskin sections (10  $\mu$ m) from E16.5-E18.5 embryos labeled with: (a) Ki67, indicative of S and M-phase cells and  $\beta 4$  integrin, a hemidesmosomal

component (arrows denote suprabasal mitoses); and (b) active caspase3 and  $\beta 4$  integrin. (c) Quantifications of phospho-histone H3 (pHH3)-positive cells, reflective of early mitosis. \*indicates statistically significant differences between WT and cKO. E17.5:  $p=0.012$ ; E18.5:  $p=0.037$ .

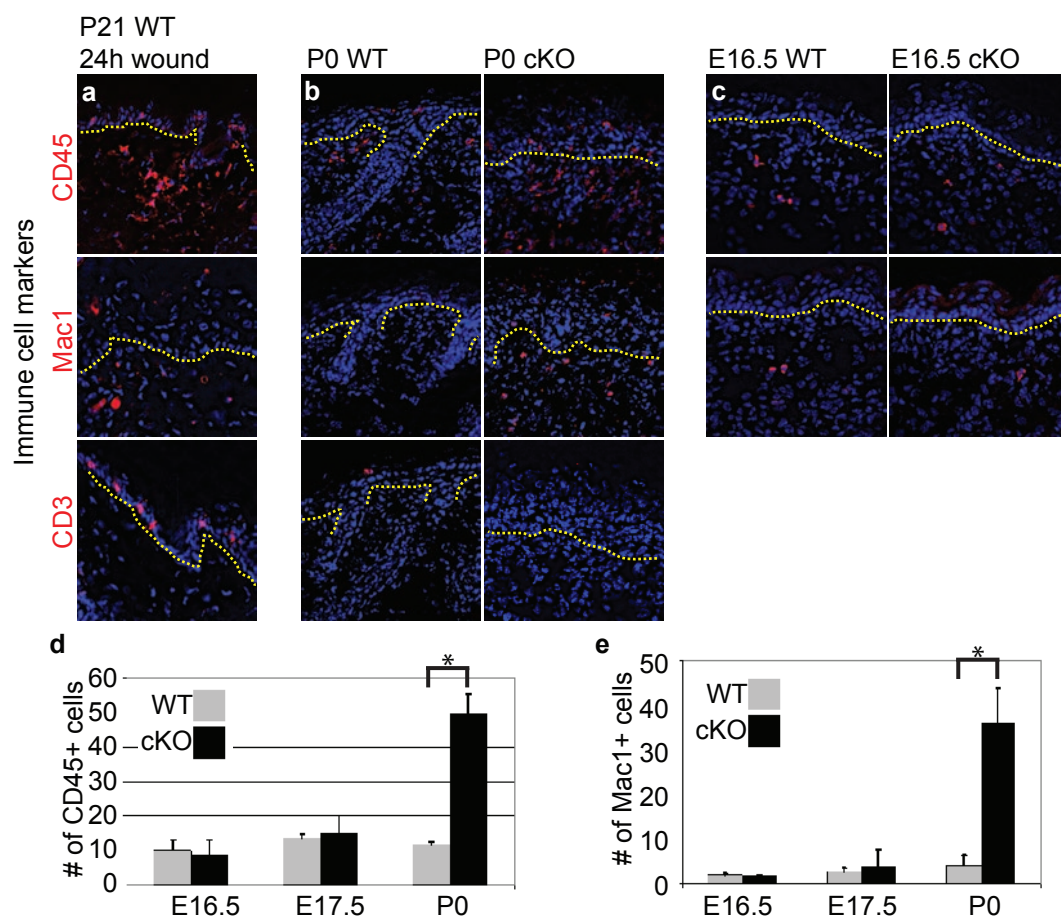

**Figure S3** Signs of inflammation in the skin are not appreciable until late after *Srf* ablation during epidermal embryogenesis. (a) Wound-induced inflammatory response in P21 CD1 mouse (positive control). 24h after wounding, backskin sections were frozen, sectioned (10  $\mu$ m) and processed for immunofluorescence with CD45, Mac1 and CD3 antibodies. (b-c) Unwounded E16.5 and newborn WT and *Srf-cKO*

embryos were frozen, sectioned and processed for immunofluorescence as in (a). Dotted lines denote dermo-epidermal boundary. Bar=20 $\mu$ m. (d-e) Quantifications of the CD45 and Mac1 positive immune cells in the skin of E16.5, E17.5 and newborn mice. \* indicates statistically significant differences between WT and cKO: CD45,  $p=0.014$ ; Mac1,  $p=0.007$ .



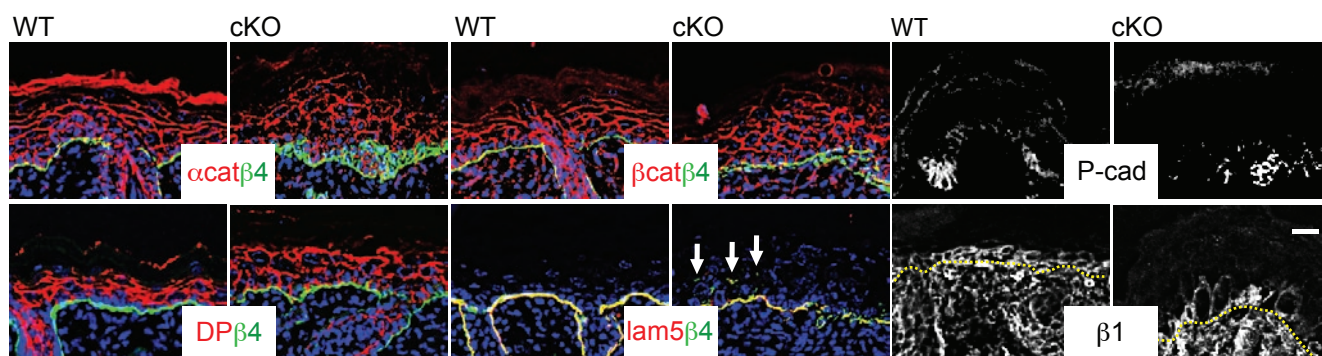

**Figure S4** Normal distribution of adhesion proteins in newborn *Srf*-cKO skin. Backskin sections from newborn mice were frozen, sectioned (10 μm) and processed for immunofluorescence with α- and β-catenin, (αcat, βcat) P-cadherin (P-cad), desmoplakin (DP), Laminin 5α, and β4 and β1 integrins (β4, β1). Note overall normal distribution of these proteins. Arrows denote suprabasal laminin 5α and β4 integrin. Dotted lines denote dermo-epidermal boundaries. Bar=20μm.

**a** FACS E16.5 basal cells
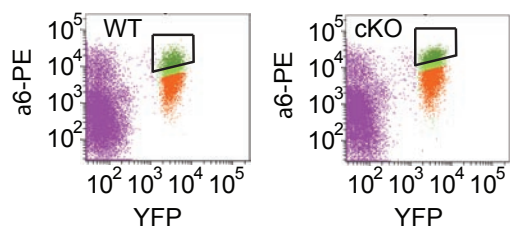
**b**
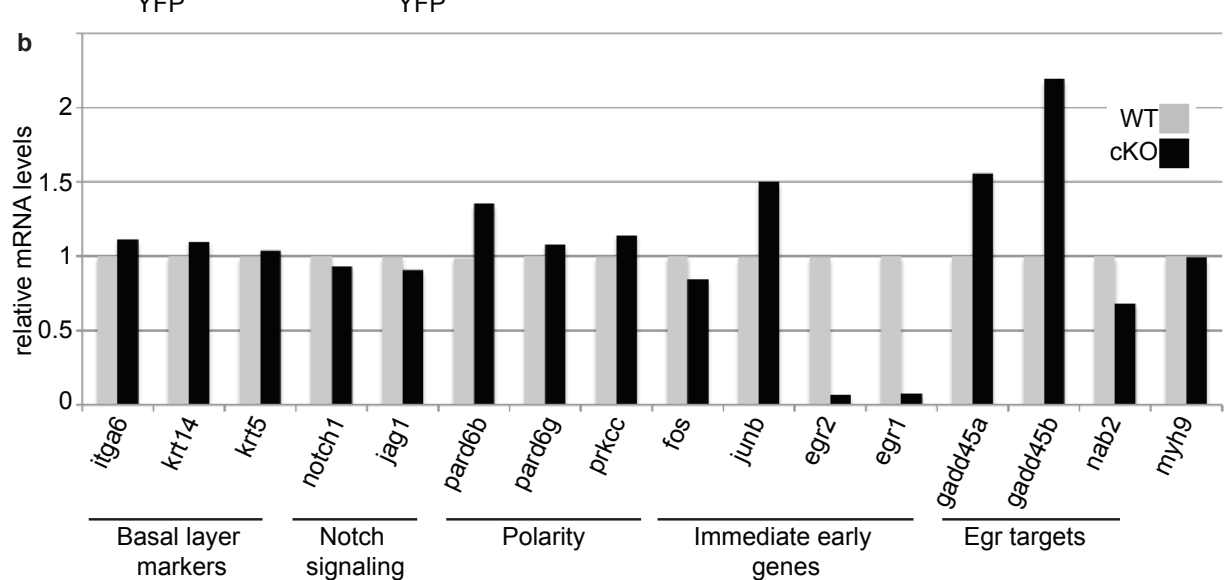

**Figure S5** Most early transcriptional changes in basal cells depleted of *Srf* involve regulators of actomyosin and not cell cycle, inflammation, apicobasal polarity, or Notch signaling genes. (a) Fluorescence activated cell sorting (FACS) profile depicting populations of E16.5 basal cells used for microarray analyses. Embryos were from *K14-Cre X Rosa26YFP fl/fl* (WT)

and *K14-Cre X Rosa26YFP fl/fl X Srf fl/fl* (cKO) strains. Basal cells active for Cre recombinase expressed YFP and were enriched for surface  $\alpha 6$  integrin (green). (b) Verification of the array results by semiquantitative RT-PCR of mRNAs from FACS-purified E16.5 basal progenitors.  $n=2$ . See Table 1 and Fig. 5a for additional details.

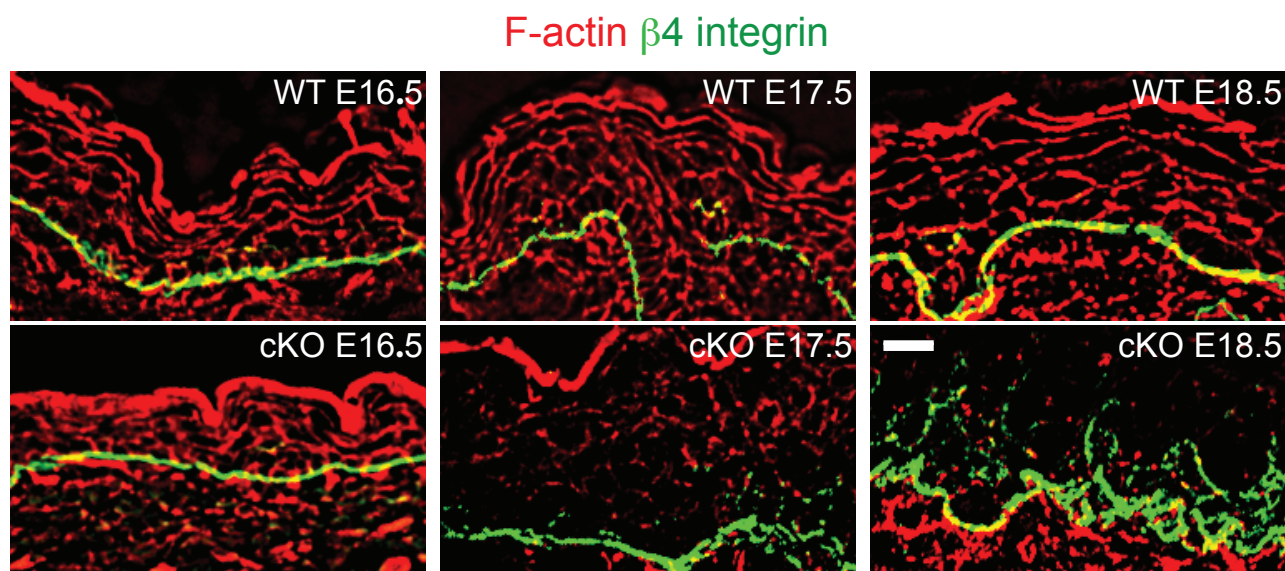

**Figure S6** Alterations the actin cytoskeleton during the development of *Srf-cKO* embryos. backskin sections from E16.5, E17.5 and E18.5 mice were frozen, sectioned (10  $\mu$ m) and processed for immunofluorescence. Phalloidin staining to mark F-actin (red) and  $\beta$ 4 integrin (green). Note the progressive loss of F-actin staining. Bar=20 $\mu$ m

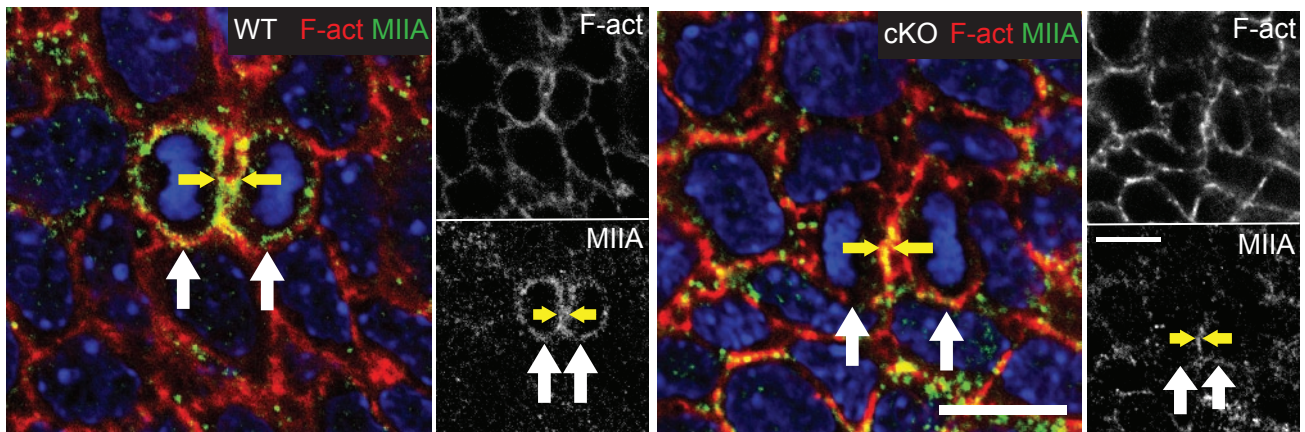

**Figure S7** Normal recruitment of myosin-IIA at the midzone of late mitotic cells deficient for Srf. WT and *Srf*-cKO E16.5 embryos were subjected to whole-mount fluorescence microscopy for F-actin (phalloidin), myosin-IIA (MIIA), and

DAPI. Shown are planar images through the basal layer. White arrows indicate late mitotic cells, enriched in MIIA in WT but not *Srf*-cKO. Yellow arrows indicate mid-zone enriched for MIIA in both WT and cKO samples. Bar=10 $\mu$ m.

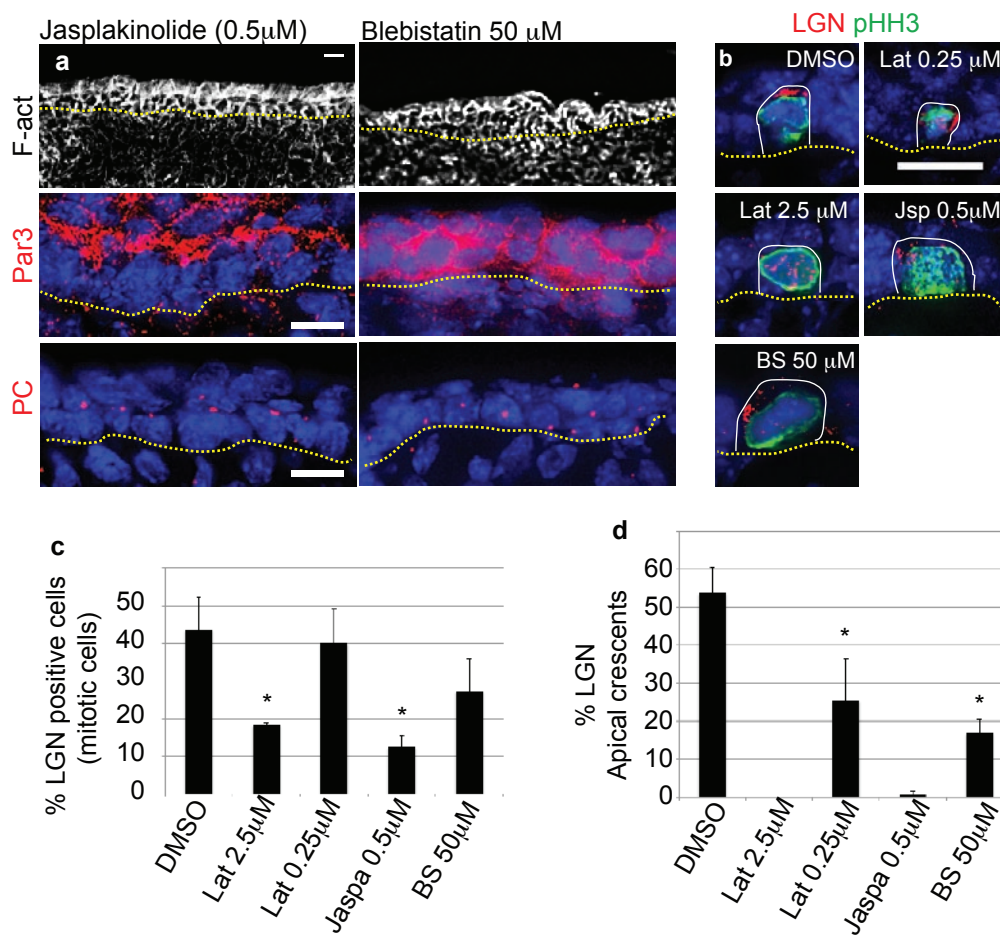

**Figure S8** LGN localization is sensitive to perturbations in actin dynamics and myosin motor activity. Live E14.5 CD1 mouse embryos were placed directly into culture medium and treated with DMSO, latrunculin (Lat 2.5 μM and 0.25 μM), jasplakinolide (Jsp 0.5 μM or blebistatin (BS, 50 μM) for 1 hour at 37°C. Embryos were then frozen in OCT, sectioned (10 μm) and processed for fluorescence microscopy: (a) F-actin (grayscale, phalloidin staining), Par3 and pericentrin (PC) (red). For the DMSO and latrunculin treatments, see Fig. 5 and main text. (b) Phosphohistone H3 (pHH3)(green), LGN (red) and

DAPI depicting representative examples of immunolocalization. Dotted line denotes dermo-epidermal boundary. Bars=20 μm. (c) Quantifications of the experimental analyses, showing percentages of early mitotic cells (pHH3+) in which LGN can be detected by immunolabeling. \* indicates  $p < 0.05$ . DMSO vs Lat 2.5 μM  $p = 0.035$  DMSO vs Jsp 0.5 μM  $p = 0.029$ . (d) Percentages of early mitotic cells (pHH3+) in which LGN exhibited an apical crescent. \* indicates  $p < 0.05$ . DMSO vs Lat 0.25 μM  $p = 0.008$ , DMSO vs Jsp 0.5 μM  $p = 0.004$ ; DMSO vs BS 50 μM  $p = 0.003$ .



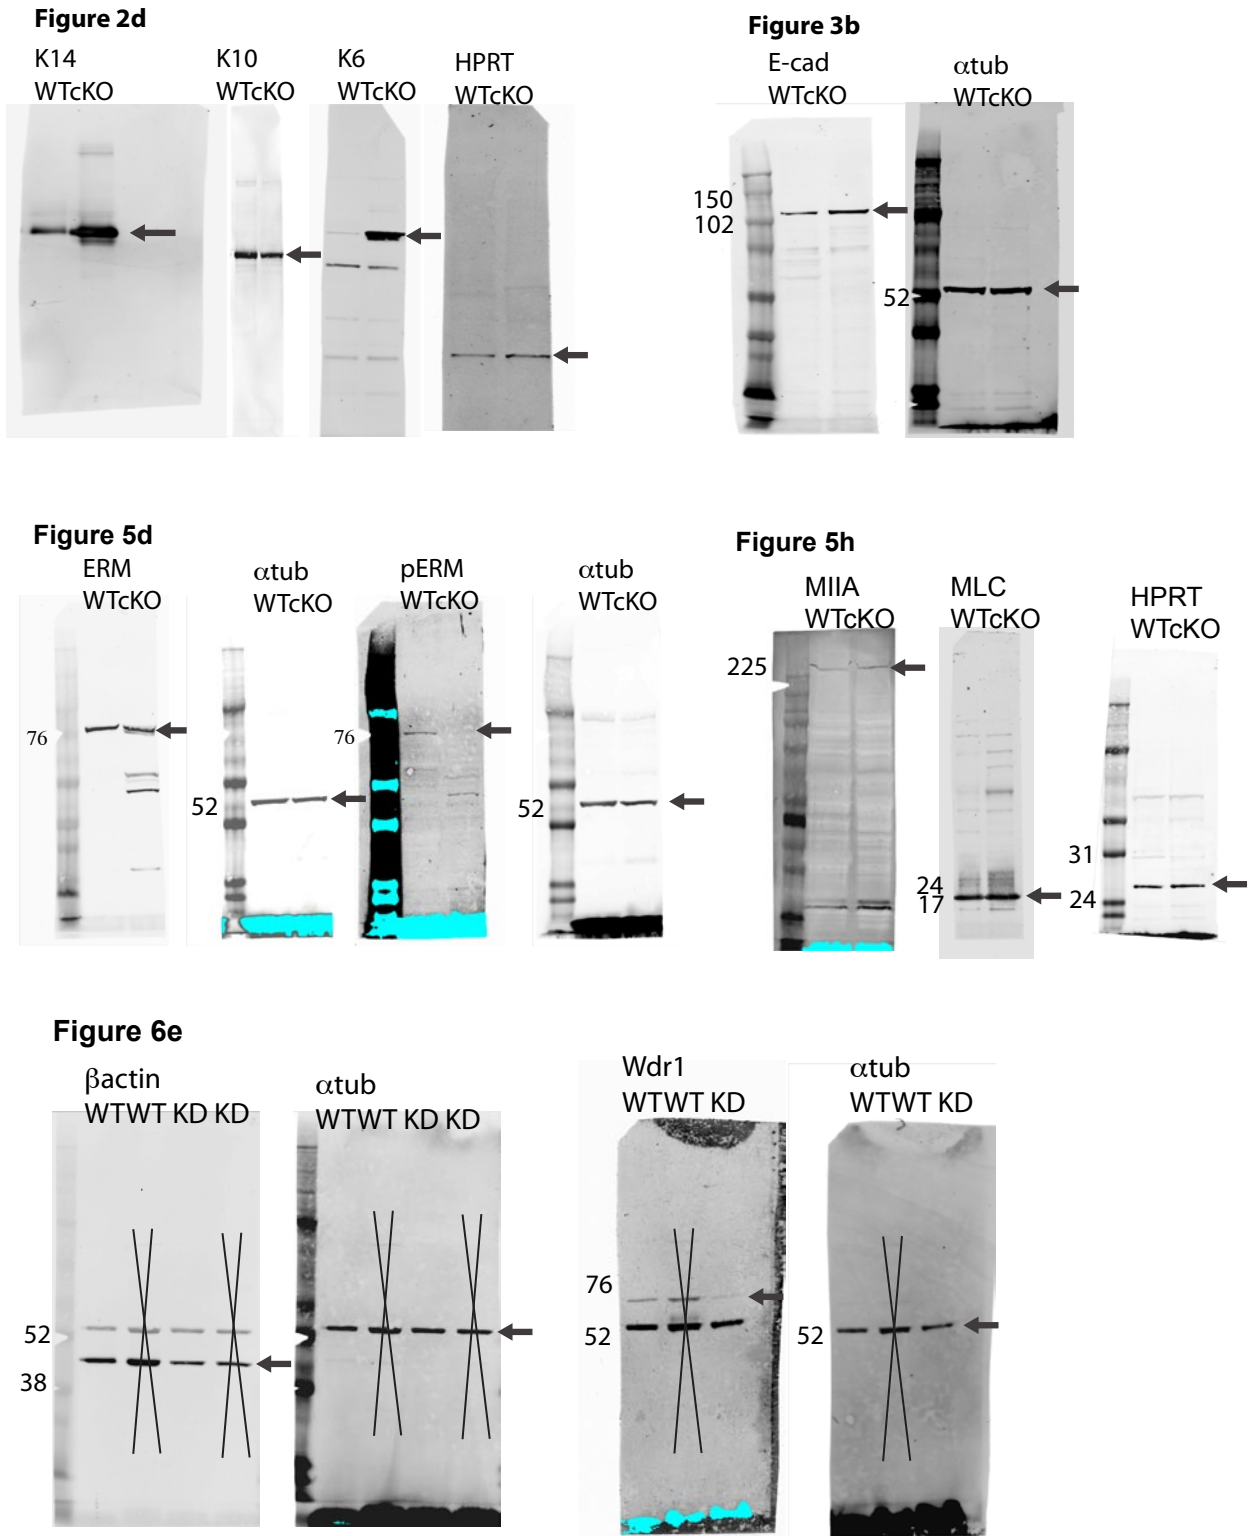

Figure S9 Full scans

**Table S1. Summary of Microarray Analysis of decrease in Gene Expression in E16.5**

***Srf* cKO vs WT Basal Cells.**

The listed probe sets were down regulated (fold change >1.5 and p<0.05) in the two independent experiment.

| Probe Set                   | Gene Symbol   | Gene Title                                                           | Mean fold change |
|-----------------------------|---------------|----------------------------------------------------------------------|------------------|
| 1427682_a_at                | Egr2          | early growth response 2                                              | 9.09             |
| 1427683_at                  | Egr2          | early growth response 2                                              | 8.12             |
| 1442067_at                  | ---           | ---                                                                  | 6.73             |
| 1417065_at                  | Egr1          | early growth response 1                                              | 5.05             |
| 1436329_at                  | Egr3          | early growth response 3                                              | 3.88             |
| 1449141_at                  | Fblim1        | filamin binding LIM protein 1                                        | 3.69             |
| 1425336_x_at                | H2-K1         | histocompatibility 2, K1, K region                                   | 3.22             |
| 1439183_at                  | Acer1         | alkaline ceramidase 1                                                | 3.155            |
| 1450645_at                  | Mt4           | metallothionein 4                                                    | 3.14             |
| 1450981_at                  | Cnn2          | calponin 2                                                           | 3.14             |
| 1436448_a_at                | Ptgs1         | prostaglandin-endoperoxide synthase 1                                | 2.96             |
| 1449204_at                  | Gjb5          | gap junction protein, beta 5                                         | 2.62             |
| AFFX-b-ActinMur/M12481_5_at | Actb          | actin, beta short chain                                              | 2.41             |
| 1457025_at                  | Sdr16c6       | dehydrogenase/reductase family 16C, member 6                         | 2.39             |
| 1451263_a_at                | Fabp4         | fatty acid binding protein 4, adipocyte                              | 2.38             |
| 1416930_at                  | Ly6d          | lymphocyte antigen 6 complex, locus D                                | 2.38             |
| AFFX-b-ActinMur/M12481_M_at | Actb          | actin, beta                                                          | 2.32             |
| 1453568_at                  | Dapl1         | death associated protein-like 1                                      | 2.30             |
| 1460330_at                  | Anxa3         | annexin A3                                                           | 2.30             |
| 1422587_at                  | Tmem45a       | transmembrane protein 45a                                            | 2.22             |
| 1424701_at                  | Pcdh20        | protocadherin 20                                                     | 2.16             |
| 1437578_at                  | Clca2         | chloride channel calcium activated 2                                 | 2.15             |
| 1417942_at                  | Lypd3         | Ly6/Plaur domain containing 3                                        | 2.10             |
| 1451308_at                  | Elovl4        | elongation of very long chain fatty acids (FEN1/Elo2, SUR4/Elo3, yea | 2.08             |
| 1417928_at                  | Pdlim4        | PDZ and LIM domain 4                                                 | 2.08             |
| 1452679_at                  | Tubb2b        | tubulin, beta 2B                                                     | 1.99             |
| 1425810_a_at                | Csrp1         | cysteine and glycine-rich protein 1                                  | 1.94             |
| 1429808_at                  | 1110020C03Rik | RIKEN cDNA 1110020C03 gene /// similar to CG4329-PA, isoform A       | 1.94             |
| AFFX-b-ActinMur/M12481_3_at | Actb          | actin, beta                                                          | 1.94             |
| 1425811_a_at                | Csrp1         | cysteine and glycine-rich                                            | 1.93             |

|              |               |                                                                                               |      |
|--------------|---------------|-----------------------------------------------------------------------------------------------|------|
| 1425811_a_at | Csrp1         | cysteine and glycine-rich protein 1                                                           | 1.93 |
| 1417408_at   | F3            | coagulation factor III                                                                        | 1.90 |
| 1456539_at   | ---           | ---                                                                                           | 1.90 |
| 1427038_at   | Penk          | preproenkephalin                                                                              | 1.90 |
| 1436722_a_at | Actb          | actin, beta                                                                                   | 1.88 |
| 1424306_at   | Elovl4        | elongation of very long chain fatty acids (FEN1/Elo2, SUR4/Elo3, yea thioesterase superfamily | 1.86 |
| 1431211_s_at | Them5         | member 5                                                                                      | 1.83 |
| 1424265_at   | Npl           | N-acetylneuraminatase pyruvate lyase                                                          | 1.83 |
| 1427910_at   | Cst6          | cystatin E/M                                                                                  | 1.81 |
| 1424842_a_at | Arhgap24      | Rho GTPase activating protein 24                                                              | 1.81 |
| 1455519_at   | Dsg1b         | desmoglein 1 beta                                                                             | 1.80 |
| 1426677_at   | Flna          | filamin, alpha                                                                                | 1.75 |
| 1415779_s_at | Actg1         | actin, gamma, cytoplasmic 1                                                                   | 1.74 |
| 1448312_at   | Pcsk2         | proprotein convertase subtilisin/kexin type 2                                                 | 1.69 |
| 1423062_at   | Igfbp3        | insulin-like growth factor binding protein 3                                                  | 1.69 |
| 1437591_a_at | Wdr1          | WD repeat domain 1                                                                            | 1.68 |
| 1419734_at   | Actb          | actin, beta                                                                                   | 1.68 |
| 1444254_at   | Tns4          | tensin 4                                                                                      | 1.63 |
| 1431429_a_at | Arl4a         | ADP-ribosylation factor-like 4A                                                               | 1.63 |
| 1459898_at   | Sbsn          | suprabasin                                                                                    | 1.63 |
| 1423054_at   | Wdr1          | WD repeat domain 1                                                                            | 1.63 |
| 1450851_at   | Wdr1          | WD repeat domain 1                                                                            | 1.62 |
| 1448318_at   | Plin2         | perilipin 2                                                                                   | 1.57 |
| 1429297_at   | Serpib12      | serine (or cysteine) peptidase inhibitor, clade B (ovalbumin), member                         | 1.57 |
| 1427256_at   | Vcan          | versican                                                                                      | 1.57 |
| 1437019_at   | 2200001115Rik | RIKEN cDNA 2200001115 gene                                                                    | 1.52 |
| 1419602_at   | Hoxa2         | homeo box A2                                                                                  | 1.52 |

**Table S2. Summary of Microarray Analysis of Increase in Gene Expression in E16.5**

***Srf* cKO vs WT Basal Cells.**

The listed probe sets were up regulated (fold change >1.5 and p<0.05) in the two independent experiment.

|              |           |                                                                            |      |
|--------------|-----------|----------------------------------------------------------------------------|------|
| 1420491_at   | Eif2s1    | eukaryotic translation initiation factor 2, subunit 1 alpha                | 3.64 |
| 1418930_at   | Cxcl10    | chemokine (C-X-C motif) ligand 10                                          | 3.29 |
| 1442886_at   | ---       | ---                                                                        | 3.23 |
| 1442700_at   | Pde4b     | phosphodiesterase 4B, cAMP specific                                        | 2.33 |
| 1439780_at   | Rpl7l1    | ribosomal protein L7-like 1                                                | 2.23 |
|              | 1200003I1 |                                                                            |      |
|              | 0Rik ///  |                                                                            |      |
|              | 1200015M  |                                                                            |      |
|              | 12Rik /// |                                                                            |      |
|              | 1200016E2 |                                                                            |      |
|              | 4Rik ///  | RIKEN cDNA 1200003I10 gene ///                                             |      |
|              | A130040M  | RIKEN cDNA 1200015M12 gene ///                                             |      |
|              | 12Rik /// | RIKEN cDNA 1200016E24 gene ///                                             |      |
|              | E430024C  | RIKEN cDNA A130040M12 gene ///                                             |      |
| 1427932_s_at | 06Rik     | RIKEN cDNA E430024C06 gene                                                 | 2.14 |
|              | 1200016E2 |                                                                            |      |
|              | 4Rik ///  |                                                                            |      |
|              | 3930401B1 |                                                                            |      |
|              | 9Rik ///  |                                                                            |      |
|              | A130040M  | RIKEN cDNA 1200016E24 gene ///                                             |      |
|              | 12Rik /// | RIKEN cDNA 3930401B19 gene ///                                             |      |
|              | E430024C  | RIKEN cDNA A130040M12 gene ///                                             |      |
| 1453238_s_at | 06Rik     | RIKEN cDNA E430024C06 gene                                                 | 1.94 |
|              |           | acyl-Coenzyme A dehydrogenase, long-chain                                  |      |
| 1448987_at   | Acadl     | LIM and senescent cell antigen-like domains 1                              | 1.83 |
| 1418230_a_at | Lims1     | niacin receptor 1                                                          | 1.81 |
| 1419721_at   | Niacr1    |                                                                            | 1.80 |
|              | D17H6S56  |                                                                            |      |
| 1417821_at   | E-5       | DNA segment, Chr 17, human D6S56E 5 cholinergic receptor, nicotinic, alpha | 1.80 |
| 1440681_at   | Chrna7    | polypeptide 7                                                              | 1.75 |
| 1439200_x_at | ---       | ---                                                                        | 1.70 |
|              |           | cysteine rich transmembrane BMP regulator 1 (chordin like)                 |      |
| 1426951_at   | Crim1     | growth arrest and DNA-damage-inducible 45 beta                             | 1.69 |
| 1450971_at   | Gadd45b   | mannose-P-dolichol utilization defect 1                                    | 1.68 |
| 1416104_at   | Mpdu1     | CREB binding protein                                                       | 1.62 |
| 1436983_at   | Crebbp    | cDNA sequence BC048355                                                     | 1.62 |
| 1460713_at   | BC048355  | erythroid differentiation regulator 1                                      | 1.62 |
| 1452406_x_at | Erdr1     | cyclin D2                                                                  | 1.57 |
| 1416124_at   | Ccnd2     | high mobility group AT-hook 2                                              | 1.57 |
| 1450780_s_at | Hmga2     | high mobility group AT-hook 2                                              | 1.52 |
| 1422851_at   | Hmga2     | structural maintenance of chromosomes 2                                    | 1.52 |
| 1429660_s_at | Smc2      | claudin 4                                                                  | 1.52 |
| 1418283_at   | Cldn4     | cyclin D2                                                                  | 1.52 |
| 1455956_x_at | Ccnd2     |                                                                            | 1.52 |



**Table S3. Semi-Quantitative RT-PCR Primers table.**

| Gene    | Forward primer                | Reverse primer               |
|---------|-------------------------------|------------------------------|
| HPRT    | gatcagtcaacgggggacataaa       | ctgcgctcatcttaggcttgt        |
| Ppib    | gtgagcgcttcccagatgaga         | tgccggagtcgacaatgatg         |
| Srf     | gttgcccgccaccatcat            | cgggcgatcattcactctt          |
| itga6   | ctggacacccgcgaggacaac         | tcaaccggccatcgcagaaact       |
| Krt14   | cgcccccctggtgtgg              | atctggcggttggtggaggta        |
| Krt5    | gttgaacgccgctgacct            | cttcggaaggacacactggac        |
| Notch1  | caaaactggcctgggtggggacat      | aaaaggccagaaagagctgccctgag   |
| Jag1    | aagggaaacagactgagctatatgactta | atttattgccaggaacaacacatcaaag |
| Pard6b  | gggacctgccgcctataaataat       | acacgggccggaagtctt           |
| Pard6g  | caagcctgggaagttgaagattt       | tgcggcatgctgatgttga          |
| Prkcc   | cagcgacagagaaaacttctgaa       | tcccgccatcatctcaaacata       |
| Numa1   | gtcaggccccctgggagact          | agcgggcccagagactgagtg        |
| Gpsm2   | tctgctgcaaagagatccaaaca       | tcatgggcaggtacaaaaagtcc      |
| Myh9    | cctgccataagggaaacctaatcac     | gcgctctggtgcctctccta         |
| Fos     | agagcgccccatccttacg           | ggtgggctgccaaaataaactc       |
| junb    | acacaggcgcatctctgaagc         | cggctccggaccagcata           |
| Egr2    | ggccgtagacaaaatcccagtaac      | gaatttgccatgtaagtgaaggtc     |
| Egr1    | atgtgggtggtaaggtggtcacta      | aaccggcccagcaagaca           |
| Nab2    | gatccggaagtacagcgctcatcta     | acttgcgggacagtgagaagagtt     |
| Gadd45a | tgccgggaaagtgcctacat          | tttctcgagcttcttctcag         |
| Gadd45b | tacgagggcgccaaactgat          | tgataccggacgatgtcaatg        |
| Cnn2    | aatgggcttctgtttcttcatct       | tcgtgggaaagcaacttagtcc       |
| Actb    | cggccaggctcatcactattgg        | aggggcccggactcatcgta         |
| Actg1   | cccaaagctaacagagagaagatgacg   | gtggtaaagctgtagccccgttca     |
| Flna    | gattggggaggagacggtgat         | tttgctggctaccctgaggatag      |
| Wdr1    | tggagcggggcgtctcta            | aatccgctgggtgcatacttg        |
